# Supplementary material
Source: PubMed Central journal article supplement (PMC3443540)
Supplement: NIHMS366201-supplement-01.pdf [file NIHMS366201-supplement-01.pdf]

**Supplementary Digital Table 1. Baseline Cardiovascular Disease Risk Factors of Women with and without Incident Cardiovascular Disease Events during Follow-up (n=2509)**

| <b>CVD Risk Factors (Baseline exam)</b> |                                         |                                            | <b>p-value</b> |
|-----------------------------------------|-----------------------------------------|--------------------------------------------|----------------|
|                                         | <b>Incident CHD during follow-up</b>    | <b>No incident CHD during follow-up</b>    |                |
| Age (years)                             | 70.1±8.5                                | 63.6±9.5                                   | <0.001         |
| Smoking                                 |                                         |                                            | 0.14           |
| Never                                   | 50%                                     | 60%                                        |                |
| Past                                    | 42%                                     | 29%                                        |                |
| Current                                 | 8%                                      | 11%                                        |                |
| Total cholesterol mg/dL                 | 210±45                                  | 201±36                                     | 0.10           |
| HDL Cholesterol mg/dL                   | 55±15                                   | 57±15                                      | 0.55           |
| Diabetes (%) <sup>a</sup>               | 26%                                     | 11%                                        | 0.001          |
| Systolic Blood Pressure mm Hg           | 141±26                                  | 128±23                                     | <0.001         |
| Diastolic Blood Pressure mm Hg          | 71±10                                   | 69±10                                      | 0.27           |
| Hypertension (%) <sup>b</sup>           | 74%                                     | 49%                                        | <0.001         |
| Family History of CVD                   | 65%                                     | 47%                                        | 0.012          |
| BMI                                     | 29.0±7.1                                | 28.4±6.1                                   | 0.52           |
|                                         |                                         |                                            |                |
|                                         | <b>Incident stroke during follow-up</b> | <b>No incident stroke during follow-up</b> |                |
| Age (years)                             | 72.6±8.3                                | 63.6±9.5                                   | <0.001         |
| Smoking                                 |                                         |                                            | 0.085          |
| Never                                   | 76%                                     | 59%                                        |                |
| Past                                    | 14%                                     | 30%                                        |                |
| Current                                 | 11%                                     | 11%                                        |                |
| Total cholesterol mg/dL                 | 202±31                                  | 202±36                                     | 0.93           |
| HDL Cholesterol mg/dL                   | 54±12                                   | 57±15                                      | 0.27           |
| Diabetes (%) <sup>a</sup>               | 27%                                     | 11%                                        | 0.003          |
| Systolic Blood Pressure mm Hg           | 146±25                                  | 128±23                                     | <0.001         |
| Diastolic Blood Pressure mm Hg          | 73±12                                   | 69±10                                      | 0.014          |
| Hypertension (%) <sup>b</sup>           | 84%                                     | 48%                                        | <0.001         |
| Family History of CVD                   | 60%                                     | 48%                                        | 0.15           |
| BMI                                     | 29.1±6.2                                | 28.4±6.1                                   | 0.48           |

<sup>a</sup>ADA 2003 definition<sup>19</sup> or use of diabetes medication.

<sup>b</sup>JNC VI definition or use of antihypertensive medication.
